# Supplementary material for: Gene Polymorphisms of FABP2, ADIPOQ and ANP and Risk of Hypertriglyceridemia and Metabolic Syndrome in Afro-Caribbeans
Source: PubMed Central journal article supplement (PMC5042446; doi:10.1371/journal.pone.0163421), 2016-09-29
Supplement: pone.0163421.s001.pdf [file pone.0163421.s001.pdf]

# Questionnaire in English

## Cardio Metabolic Risk

Date: /\_\_ /\_\_ /\_\_ /\_\_ /

Diabetes: yes no

if yes T2D : yes no

Diabetes vintage: /\_\_\_\_\_/ year

### Demographic Parameters

Number: /\_\_\_\_\_/

Group: /\_\_\_/ (Case =1; Control = 0) (case = History of CAD or Stroke)

Gender: Male Female (1=M; 2=F)

Birth date: /\_\_ /\_\_ /\_\_ /\_\_ /

Place of birth: \_\_\_\_\_

ZIP code of residence: \_\_\_\_\_

### History related to cardiovascular and arterial diseases.

#### *Family history*

Fam hist for hypertension: yes no

Fam hist for diabetes: yes no

#### *Personal*

Hypertension: yes no

Stroke: yes no

CAD: yes no

Myocardial Infarction : yes no

Angina: yes no

Lower limbs arteriopathy: yes no

if yes, Amputation : yes no

### Mode de vie

Tobacco: yes no (yes = current smoker or stop for less than 10 years, no = others)

Alcohol: yes no

If yes: wine yes no; rum: yes no; nbr glasses / day / \_\_ /

Sports: yes no; if yes nbr hours weekly / \_\_ /

### **Current treatment**

Antihypertensive: yes no

ACE: yes no      Calcium blocker : yes no

Beta blocker: yes no other Tt : yes no      if yes : \_\_\_\_\_

Anti-diabetic Tt: yes no

If yes    OAD    Insulin    both

Hypolipemic Tt: yes no

Antiplatelet agents: yes no

Clinical data

Weight: /\_\_\_\_\_/kg      Height: /\_\_\_\_\_/m      Waist circumference /\_\_\_\_\_/ cm

### **Electrocardiogram**

ECG:      normal    abnormalities

If abnormal: ischemic yes no

### **Biological data**

C-RP: /\_\_\_/      mg/L

Hemoglobin: /\_\_\_/ g/dl      Hématocrite: /\_\_\_/ %

Creatinine: /\_\_\_/ μmol/L

Total Cholesterol: /\_\_\_/ mmol/L

HDL-Cholesterol: /\_\_\_/ mmol/L

LDL-Cholesterol: /\_\_\_/ mmol/L

Triglycerides: /\_\_\_/ mmol/L

FBG: /\_\_\_/ mmol/L
