# Supplementary material for: Gene Polymorphisms of FABP2, ADIPOQ and ANP and Risk of Hypertriglyceridemia and Metabolic Syndrome in Afro-Caribbeans
Source: PubMed Central journal article supplement (PMC5042446; doi:10.1371/journal.pone.0163421), 2016-09-29
Supplement: pone.0163421.s002.pdf [file pone.0163421.s002.pdf]

# Questionnaire in French

## Risque Cardio Métabolique

Date : /\_\_/\_/\_\_\_\_ \_/

Diabète  oui  non

Si oui DT2 :  oui  non

Ancienneté du diabète : /\_\_\_\_\_/ ans

### Paramètres démographiques

Num : /\_\_\_\_\_/

Groupe : /\_\_\_/ (Cas =1 Témoin = 0) (cas = ATCD de coronaropathie ou AVC)

Sexe :  Masculin  Féminin (1=M, 2=F)

Date de naissance : /\_ \_/ \_ \_/ \_ \_ \_/

Lieu de naissance : \_\_\_\_\_

Code postal de résidence : \_\_\_\_\_

### Antécédents relatifs aux pathologies cardiovasculaires et artérielles.

#### Familiaux

Familiaux d'HTA :  oui  non

Familiaux de diabète :  oui  non

#### Personnels

Hypertension :  oui  non

Personnel AVC :  oui  non

Coronaropathie :  oui  non

Infarctus :  oui  non

Angor :  oui  non

Artériopathie :  oui  non

si oui, Amputation :  oui  non

### **Mode de vie**

Tabac :  oui  non (oui=fumeur actuel ou arrêt depuis moins de 10 ans, non =les autres)

Alcool :  oui  non Type vin  oui  non rhum  oui  non  
si oui nbr verres/jour /\_\_\_/

Pratique sportive :  oui  non si oui nbr heures hebdomadaires /\_\_\_/

### Traitement en cours

Hypotenseur :  oui  non

IEC :  oui  non

Inhibiteurs calciques :  oui  non

Bétabloquants :  oui  non

Autres Tt :  oui  non si oui type Tt :

**Antidiabétiques :**

ADO  insuline  les deux

**Hypolipémiant:**  oui  non

**Antiagrégants plaquettaires :**  oui  non

**Données cliniques**

Poids : /\_\_\_/ kg

Taille : /\_\_\_/ m

Tour de taille /\_\_\_ / cm

**Electrocardiogramme**

ECG :  normal  anomalies

Si anomalie : ischémiques  oui  non

**Données biologiques**

CRP : /\_\_\_/ mg/L

Hémoglobine : /\_\_\_/ g/dl

Urée : /\_\_\_/ mmol/L

Cholestérol total : /\_\_\_/ mmol/L

HDL cholestérol : /\_\_\_/ mmol/L

LDL cholestérol : /\_\_\_/ mmol/L

Triglycérides : /\_\_\_/ mmol/L

Glycémie : /\_\_\_/ mmol/L

Hématocrite : /\_\_\_/ %

Créatinine : /\_\_\_/ μmol/L
